# Supplementary material for: Bottom-up synthesis of a pyramid-type (Pt/4nmCeO2)/SiO2 catalyst via a surface reduction strategy
Source: Royal Society of Chemistry journal article supplement (doi:10.1039/d3ta01563g), 2023-01-01
Supplement: d3ta01563g1.pdf [file d3ta01563g1.pdf]

## Supporting Information

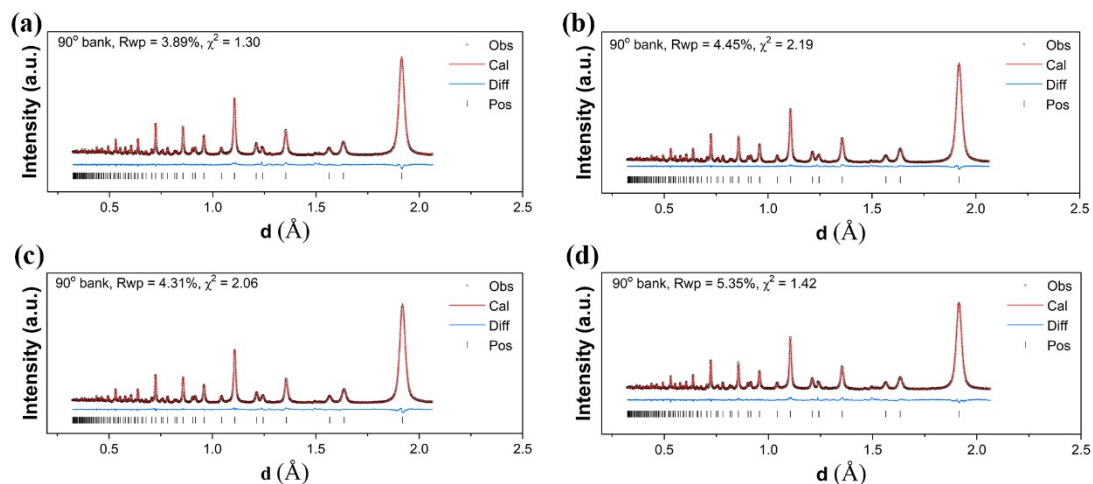

**Figure S1.** Rietveld refining of (a) as-prepared  $\text{CeO}_2$ ; (b)  $\text{CeO}_2$  reduced at  $400^\circ\text{C}$  (without the consideration of H species); (c)  $\text{CeO}_2$  reduced at  $400^\circ\text{C}$  (with the consideration of H species); (d) Oxidized  $\text{CeO}_2$ . The different curves (blue curves) of these four patterns are basically straight lines, and the value of  $R_{wp}$  and  $\chi^2$  are very small, which represent the high rationality of these refinement results.

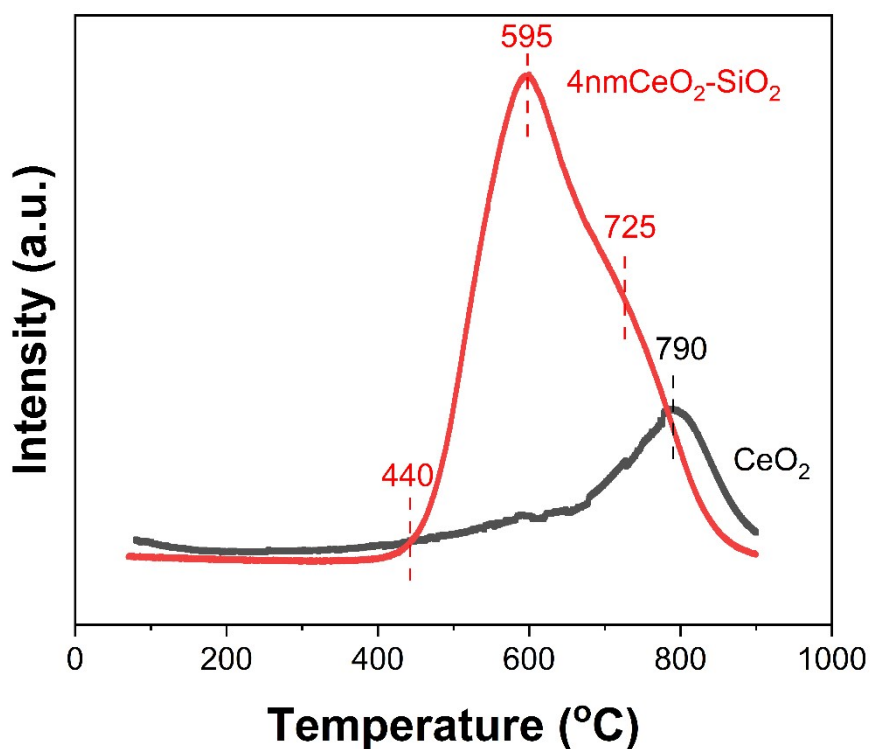

**Figure S2.** TPD of  $\text{CeO}_2$  and  $4\text{nmCeO}_2\text{-SiO}_2$  that were pre-reduced at  $400^\circ\text{C}$ . The signal of  $m/z=2$  was recorded and display in this picture. Experiment condition: heating rate  $5^\circ\text{C}/\text{min}$ , vented with  $30\text{ mL}/\text{min}$  Ar.

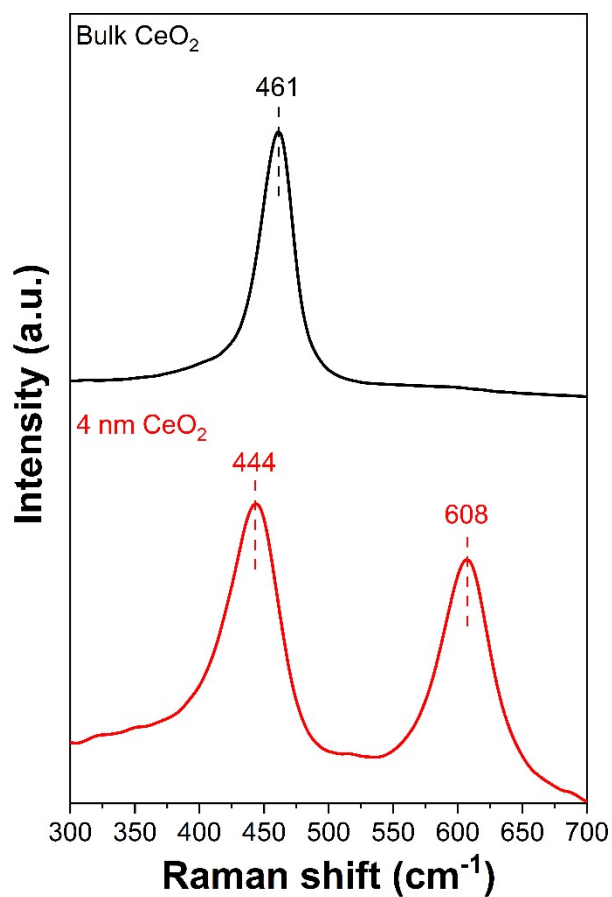

**Figure S3.** Raman spectra of bulk CeO<sub>2</sub> and 4 nm CeO<sub>2</sub>.

Supplementary discussion for **Figure S3**:

Raman spectrum is a common characterization for oxygen vacancy in CeO<sub>2</sub>.<sup>1,2</sup> There is only one Raman peak located at 461 cm<sup>-1</sup> in bulk CeO<sub>2</sub>, which is the F<sub>2g</sub> symmetric breathing mode of lattice O atoms. Once CeO<sub>2</sub> nanoparticle size is decreased to ~4 nm, a new Raman peak located at 608 cm<sup>-1</sup> was observed. This peak is attributed to oxygen vacancy in CeO<sub>2</sub> lattice.<sup>3,4</sup> This comparison indicates that decreasing CeO<sub>2</sub> nanoparticle size to ~4 nm could greatly improve the oxygen vacancy concentration compared to bulk CeO<sub>2</sub>.

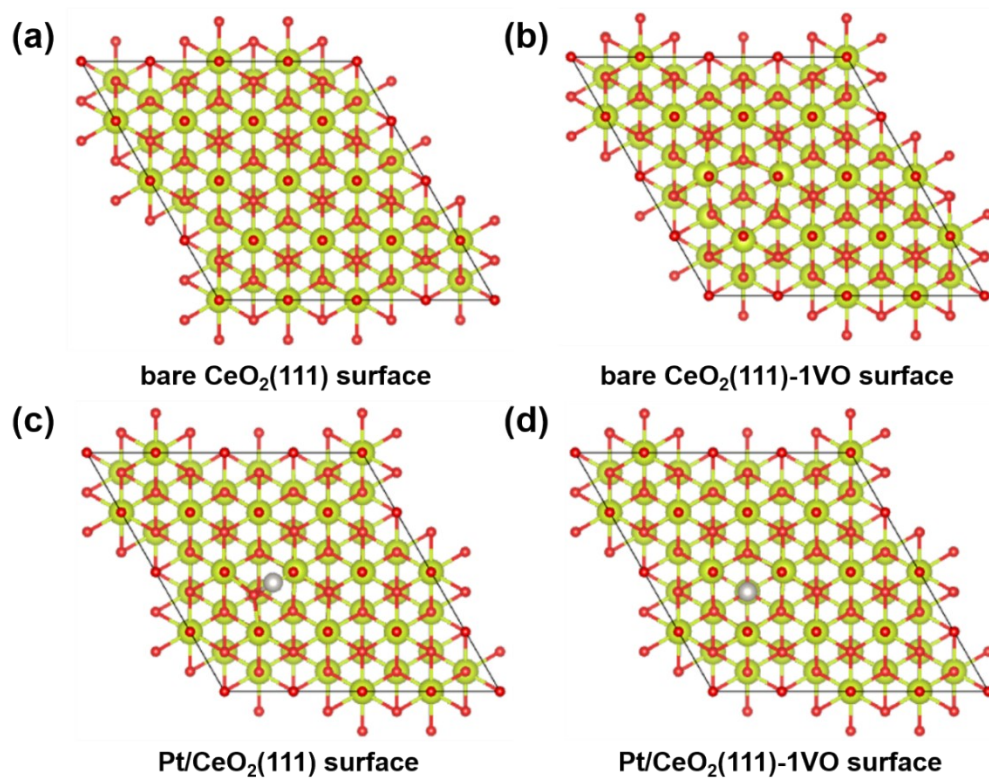

**Figure S4.** The models of (a) bare CeO<sub>2</sub>(111) surface, (b) bare CeO<sub>2</sub>(111) surface with 1 oxygen vacancy (VO), (c) Pt deposited on CeO<sub>2</sub>(111) surface and (d) Pt deposited on CeO<sub>2</sub>(111) surface with 1 VO. Yellow: Ce atom, red: O atom, gray: Pt atom.

Supplementary discussion for **Figure S4**:

The CeO<sub>2</sub> support in **Figure S4**(a,c) is composed of 96 O atoms and 48 Ce atoms by forming three layers. In comparison, defected CeO<sub>2</sub> support in **Figure S4**(b,d) is composed of 95 O atoms and 48 Ce atoms by removing one O atom on the first layer of CeO<sub>2</sub> support. Pt atom is placed on the location of oxygen vacancy on defected CeO<sub>2</sub> support. In comparison, Pt atom is also placed on similar location of CeO<sub>2</sub> support. The single point energies of **Figure S4** are listed in **Table S1**.

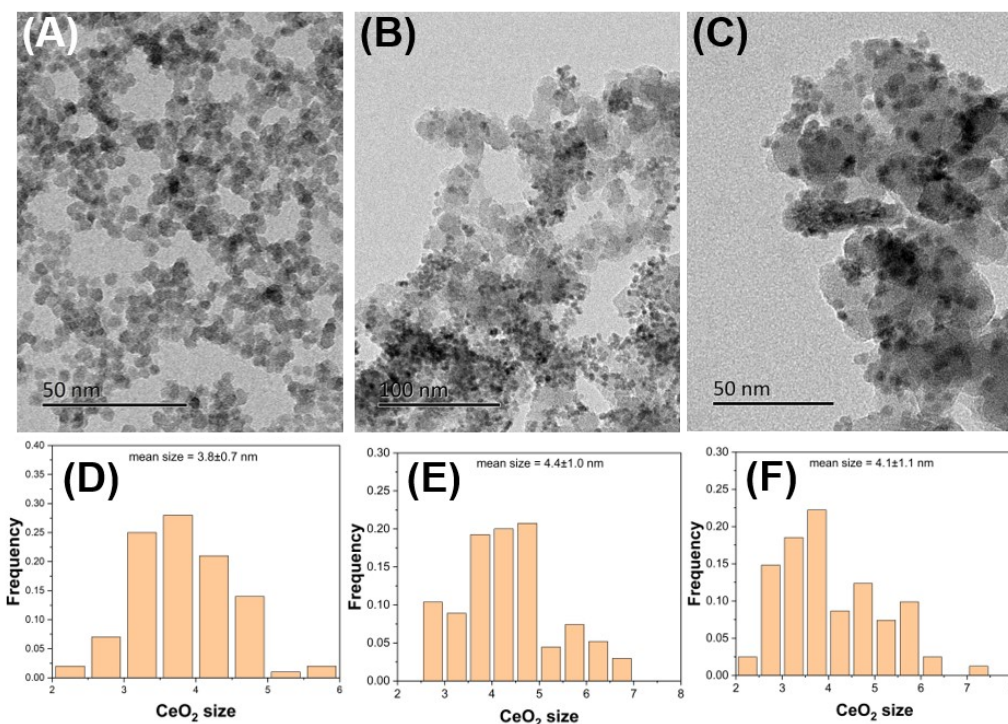

**Figure S5.** TEM image of (A) 4 nm CeO<sub>2</sub> colloid, (B) 4nmCeO<sub>2</sub>-SiO<sub>2</sub> and (C) 4nmCeO<sub>2</sub>-SiO<sub>2</sub> after 400 °C reduction for 2 h. CeO<sub>2</sub> nanoparticle size distribution of (D) 4 nm CeO<sub>2</sub> colloid, (E) 4nmCeO<sub>2</sub>-SiO<sub>2</sub> and (F) 4nmCeO<sub>2</sub>-SiO<sub>2</sub> after 400 °C reduction for 2 h.

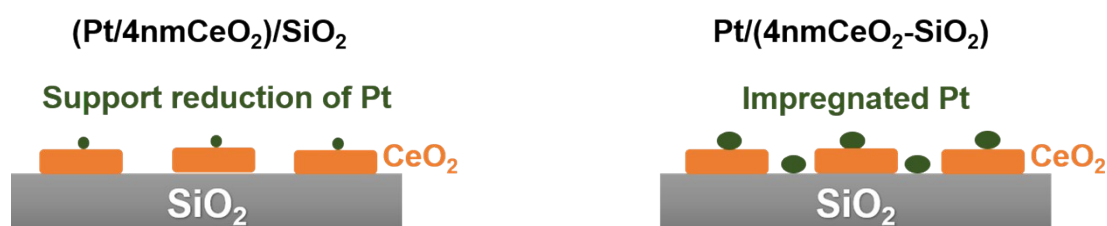

**Figure S6.** Catalyst models of (Pt/4nmCeO<sub>2</sub>)/SiO<sub>2</sub> and Pt/(4nmCeO<sub>2</sub>-SiO<sub>2</sub>).

Supplementary discussion for **Figure S6:**

During the preparation of (Pt/4nmCeO<sub>2</sub>)/SiO<sub>2</sub> sample via SRS, the reductive centers on 4 nm CeO<sub>2</sub> nano-islands react with the H<sub>2</sub>PtCl<sub>6</sub> precursor, leading to the Pt deposition on CeO<sub>2</sub> surface. In contrast, the pre-reduction generates no reducing species on SiO<sub>2</sub> surface due to its irreducible property. The lack of chemical reactions between SiO<sub>2</sub> surface and H<sub>2</sub>PtCl<sub>6</sub> precursor leads to the weak interaction between Pt and SiO<sub>2</sub>. Furthermore, the deionized water washing at the last step of catalyst preparation could remove Pt atoms that are weakly bound on 4nmCeO<sub>2</sub>/SiO<sub>2</sub> surface.

On the other hand, Pt/(4nmCeO<sub>2</sub>-SiO<sub>2</sub>) is prepared by impregnation method, which could not control the location of Pt. Thus, the Pt was randomly deposited on 4nmCeO<sub>2</sub>-SiO<sub>2</sub> support. There is only 10wt% 4 nm CeO<sub>2</sub> nano-islands in 4nmCeO<sub>2</sub>-SiO<sub>2</sub> support, so the SiO<sub>2</sub> surface is the dominate surface in this support. Therefore, once Pt is randomly deposited on 4nmCeO<sub>2</sub>-SiO<sub>2</sub> support with impregnation, most Pt species are located on SiO<sub>2</sub> surface.

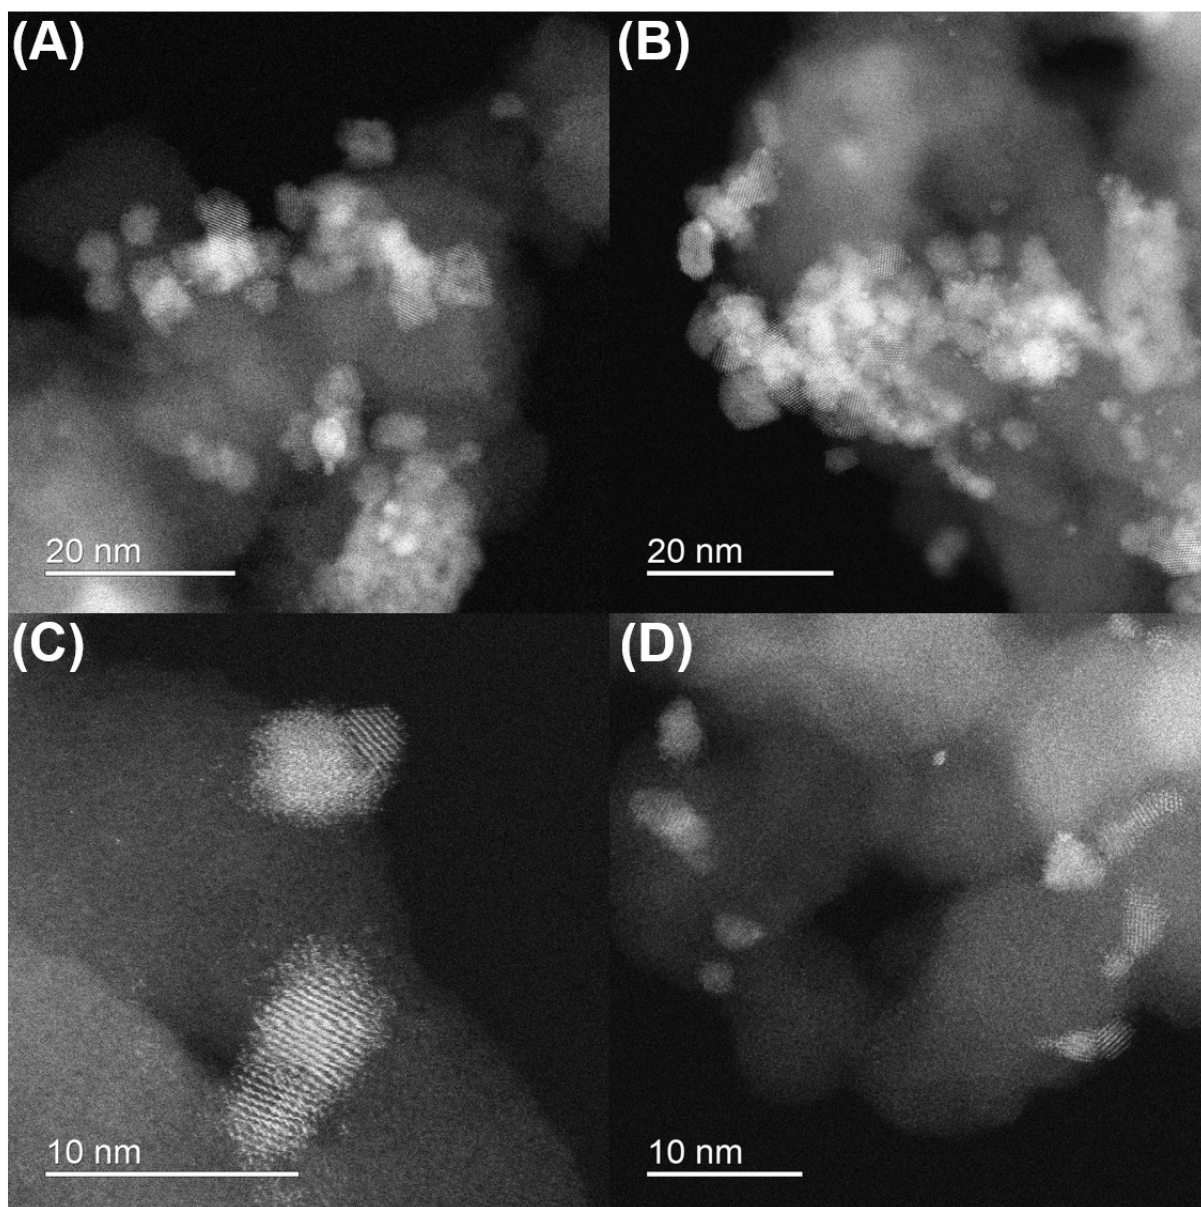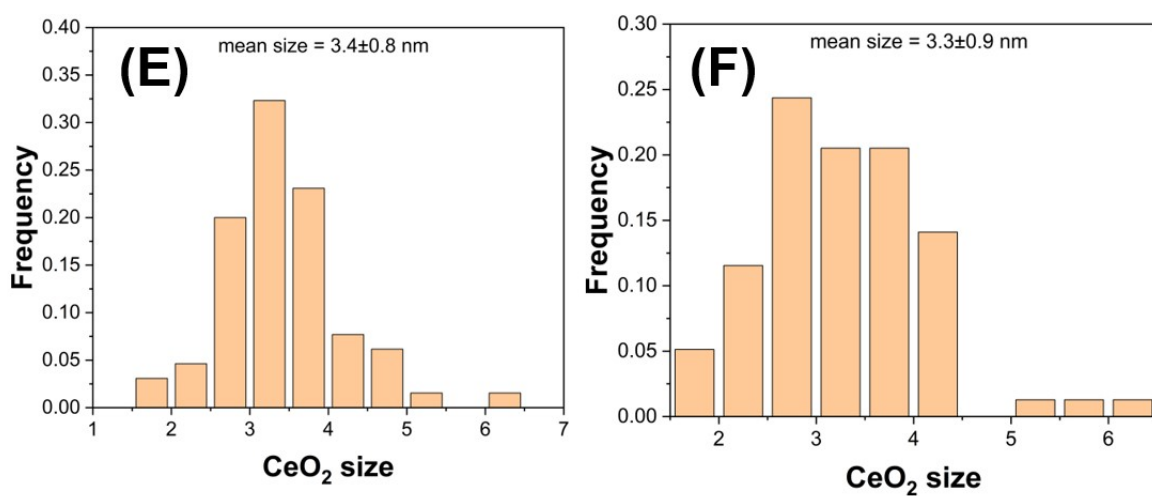

**Figure S7.** HADDF-STEM images of (A,C) (Pt/4nmCeO<sub>2</sub>)/SiO<sub>2</sub> and (B,D) Pt/(4nmCeO<sub>2</sub>-SiO<sub>2</sub>) with various scale bars. CeO<sub>2</sub> nanoparticle size distribution in (E) (Pt/4nmCeO<sub>2</sub>)/SiO<sub>2</sub> and (F) Pt/(4nmCeO<sub>2</sub>-SiO<sub>2</sub>).

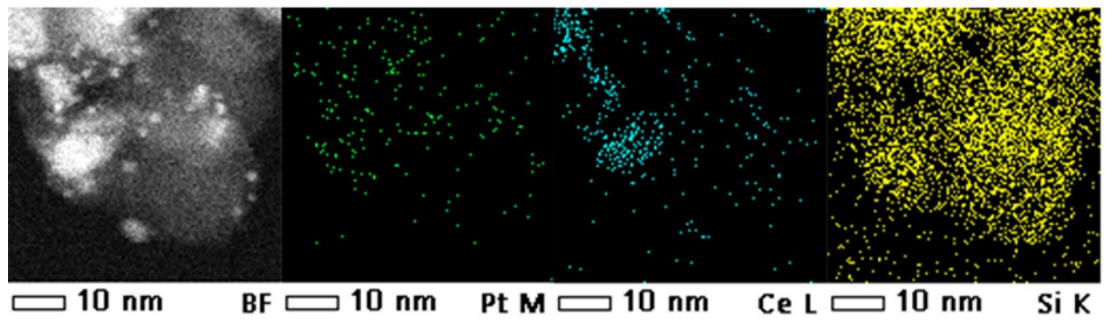

Figure S8. Energy dispersive spectrometer (EDS) mapping of (Pt/4nmCeO<sub>2</sub>)/SiO<sub>2</sub>.

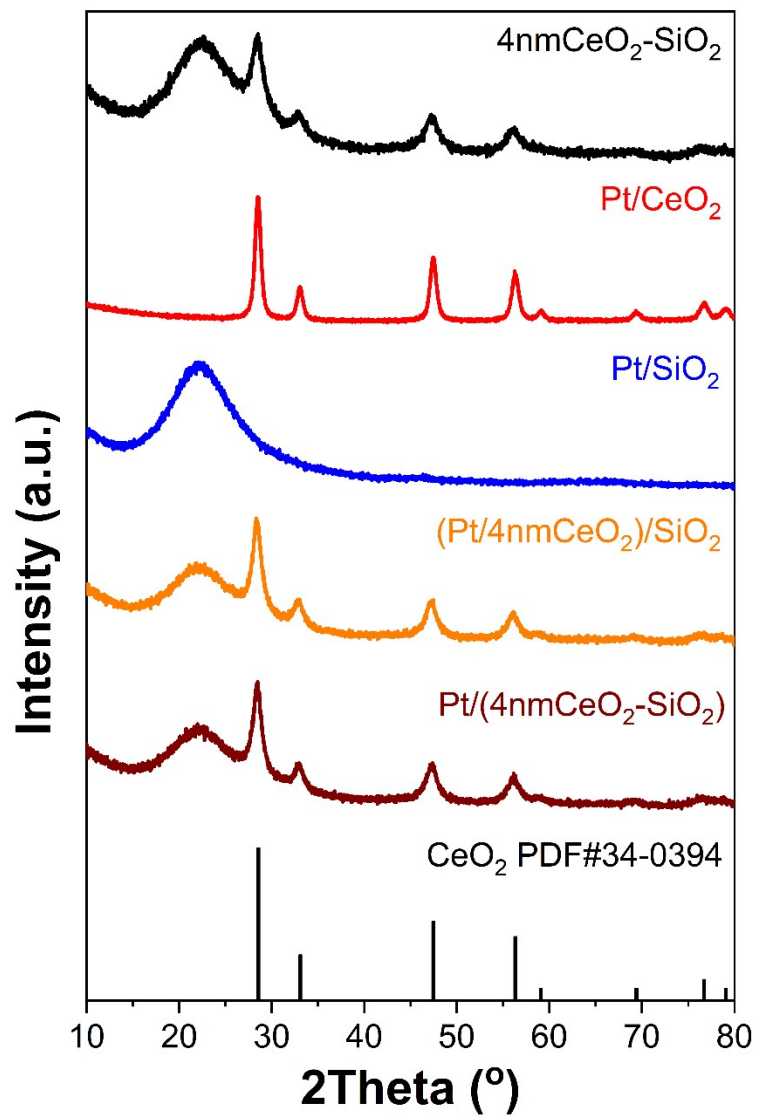

Figure S9. XRD patterns of (Pt/4nmCeO<sub>2</sub>)/SiO<sub>2</sub>, Pt/(4nmCeO<sub>2</sub>-SiO<sub>2</sub>), and control catalysts.

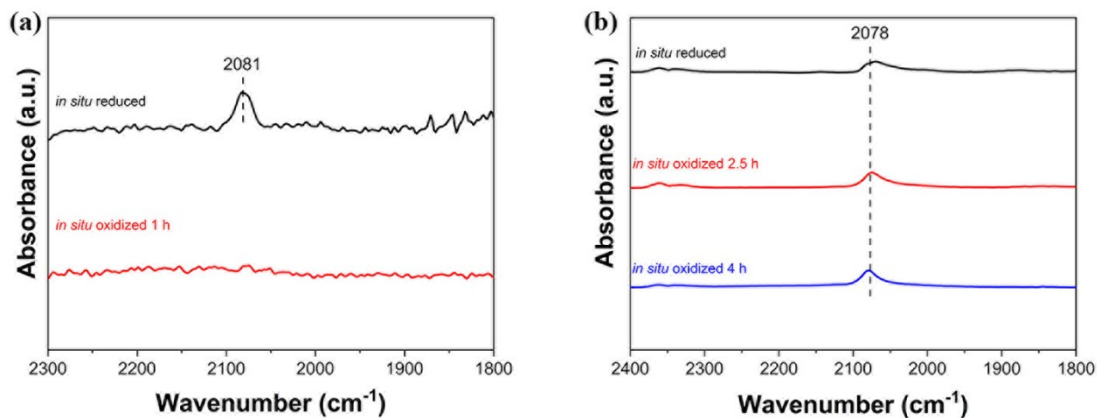

Figure S10. CO-FTIR spectra of (a) Pt/CeO<sub>2</sub>, (b) Pt/SiO<sub>2</sub>.

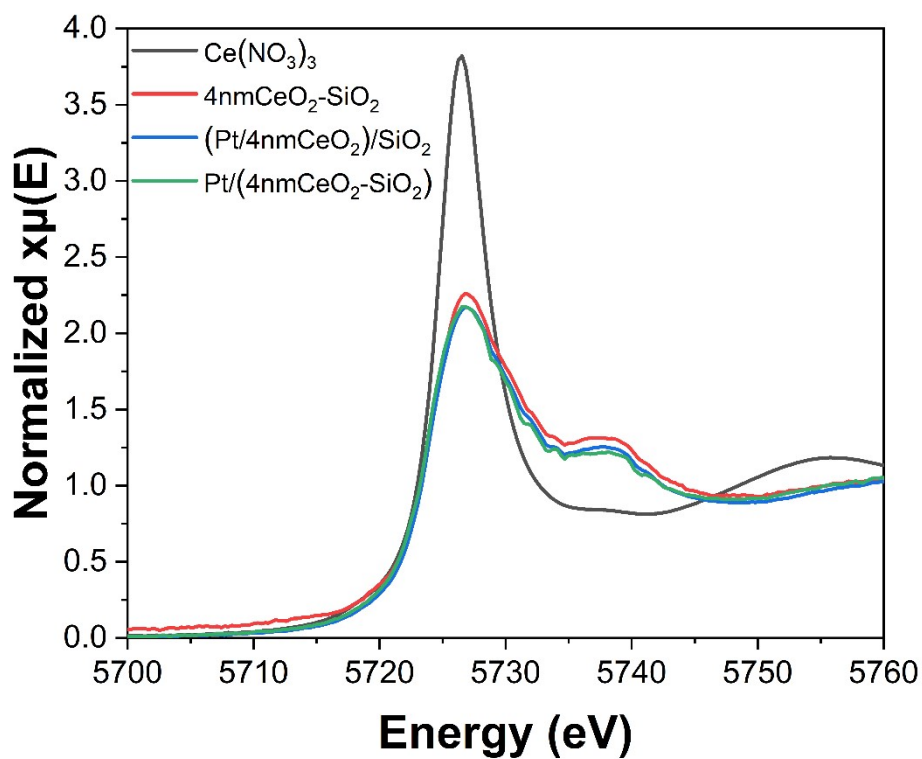

Figure S11. XANES of Ce L<sub>3</sub> edge of *in situ* reduced 4nmCeO<sub>2</sub>-SiO<sub>2</sub>, (Pt/4nmCeO<sub>2</sub>)/SiO<sub>2</sub> and Pt/(4nmCeO<sub>2</sub>-SiO<sub>2</sub>). Ce(NO<sub>3</sub>)<sub>3</sub> is set as a reference sample.

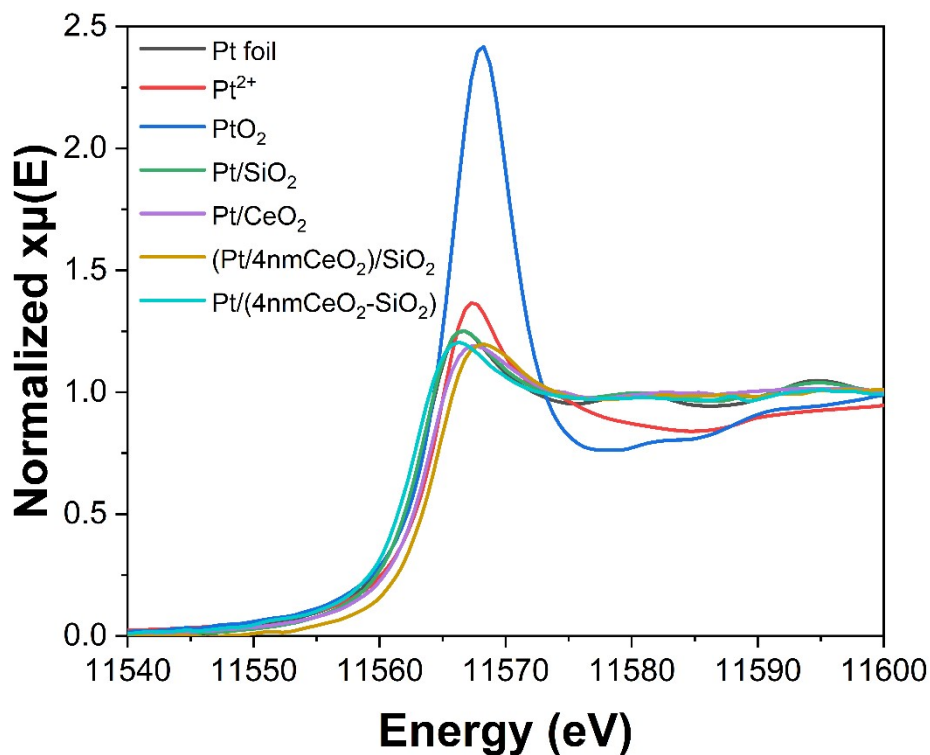

**Figure S12.** XANES of Pt L<sub>3</sub> edge of *in situ* reduced Pt/SiO<sub>2</sub>, Pt/CeO<sub>2</sub>, (Pt/4nmCeO<sub>2</sub>)/SiO<sub>2</sub> and Pt/(4nmCeO<sub>2</sub>-SiO<sub>2</sub>). PtO<sub>2</sub> was used as a reference standard for Pt<sup>4+</sup>. Pt(NH<sub>3</sub>)<sub>4</sub>(NO<sub>3</sub>)<sub>2</sub> was used as a reference standard for Pt<sup>2+</sup>. Pt foil was used as a reference standard for Pt<sup>0</sup>.

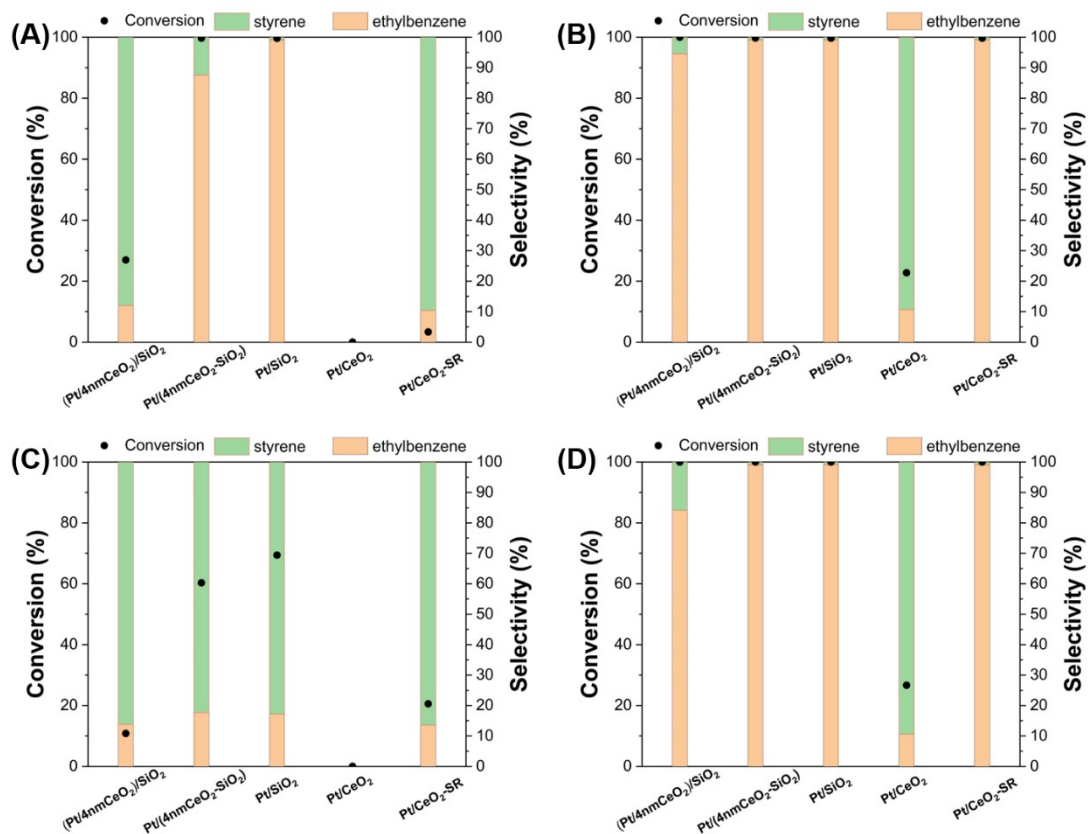



**Figure S13.** Phenylacetylene hydrogenation under (A) 0.5 MPa H<sub>2</sub>, 1 h; (B) 2 MPa H<sub>2</sub>, 1 h; (C) 1 MPa H<sub>2</sub>, 0.5 h and (D) 1 MPa H<sub>2</sub>, 2 h. Additional conditions: 0.4 mmol phenylacetylene, 40 °C. Circles: conversion. Bars: selectivity of styrene and ethylbenzene.

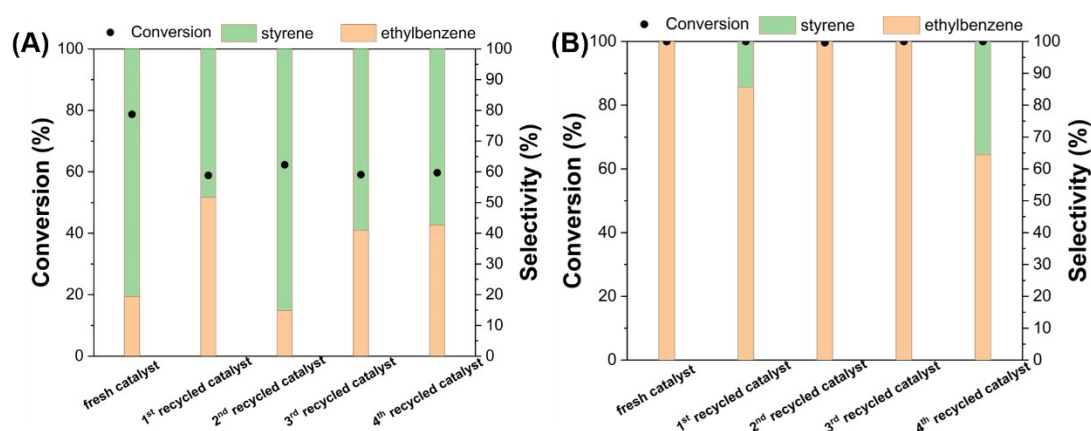

**Figure S14.** Catalyst recycle test of (A) (Pt/4nmCeO<sub>2</sub>)/SiO<sub>2</sub>; (B) Pt/(4nmCeO<sub>2</sub>-SiO<sub>2</sub>). Conditions: 0.4 mmol phenylacetylene, 1 MPa H<sub>2</sub>, 1 h, 40 °C. Circles: conversion. Bars: selectivity of styrene and ethylbenzene.

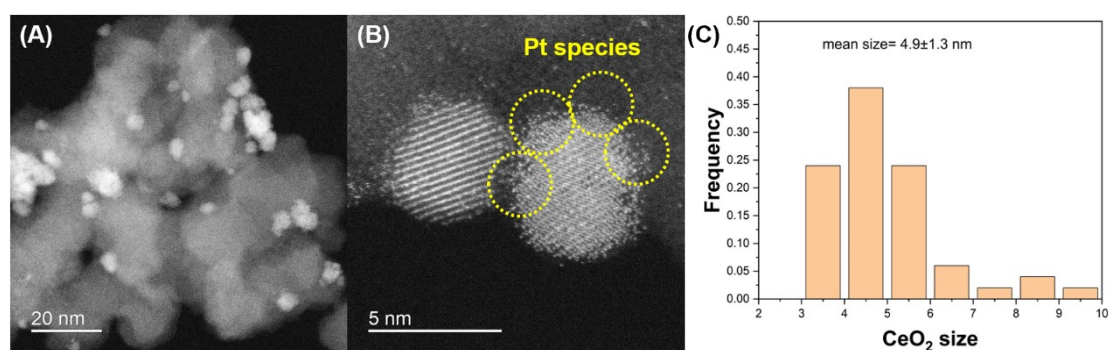

**Figure S15.** HADDF-STEM images of 4<sup>th</sup> recycled (Pt/4nmCeO<sub>2</sub>)/SiO<sub>2</sub> catalyst.

**Table S1.** The Pt binding energy on CeO<sub>2</sub>(111) surface.

| Models                      | 1 VO on CeO <sub>2</sub> (111) | Perfect CeO <sub>2</sub> (111) |
|-----------------------------|--------------------------------|--------------------------------|
| CeO <sub>2</sub> (111) (eV) | -1159.6300                     | -1168.3951                     |
| Pt single atom (eV)         | 2.3733                         | 2.3733                         |
| Pt/CeO <sub>2</sub> (eV)    | -1161.3518                     | -1168.1295                     |
| Pt binding energy (eV)      | -4.0951                        | -2.1077                        |

Supplementary description for **Table S1**:

**Table S1** summarizes the single point energy of different models displayed in **Figure S4**, upon which the Pt binding energy is calculated. For example, the single point energy of CeO<sub>2</sub>(111) surface (96 O atoms + 48 Ce atoms) is -1168.3951 eV according to the OUTCAR file of VASP. And the single point energy of Pt single atom is 2.3733 eV. Once Pt is placed on the CeO<sub>2</sub>(111) surface, its overall single point energy becomes -1168.1295 eV. Therefore, the Pt binding energy on perfect CeO<sub>2</sub>(111) surface is calculated as -2.1077 eV. On the other hand, the Pt binding energy in the oxygen vacancy of CeO<sub>2</sub>(111) surface is calculated as -4.0951 eV. Based on these two binding energies, it is concluded that Pt has stronger interaction with defected CeO<sub>2</sub> surface.

**Table S2.** ICP-OES characterization for Pt on different samples.

| Samples                                        | Pt loading amount/wt% |
|------------------------------------------------|-----------------------|
| Pt/CeO <sub>2</sub> -SR                        | 0.37                  |
| Pt/CeO <sub>2</sub> -NR                        | 0.14                  |
| (Pt/4nmCeO <sub>2</sub> )/SiO <sub>2</sub>     | 0.23                  |
| (Pt/4nmCeO <sub>2</sub> )/SiO <sub>2</sub> -NR | 0.08                  |

Supplementary description for **Table S2**:

The key difference between Pt/CeO<sub>2</sub>-SR and Pt/CeO<sub>2</sub>-NR, (Pt/4nmCeO<sub>2</sub>)/SiO<sub>2</sub> and (Pt/4nmCeO<sub>2</sub>)/SiO<sub>2</sub>-NR is whether there is a pre-reduction step. It is expected that if reducing species (adsorbed H species and Ce<sup>3+</sup> species) are fully oxidized as soon as CeO<sub>2</sub> and 4nmCeO<sub>2</sub>/SiO<sub>2</sub> are taken out from reducing furnace, the Pt loading amount on all four samples should be similar because the feeding amount ratios of Pt : CeO<sub>2</sub> and Pt : (4nmCeO<sub>2</sub>-SiO<sub>2</sub>) were controlled as 0.5wt% in all preparations. **Table S2** shows the Pt loading amount of these four samples, and it is observed that the pre-reduction treatment improves Pt loading amount on both CeO<sub>2</sub> support and 4nmCeO<sub>2</sub>/SiO<sub>2</sub> support. This observation proves that not all reducing species (adsorbed H species and Ce<sup>3+</sup> species) generated in pre-reduction is oxidized once the bare supports (bulk CeO<sub>2</sub> and 4nmCeO<sub>2</sub>-SiO<sub>2</sub>) are exposed to air at room temperature.

**Table S3.** XANES spectra of Ce L<sub>3</sub> edge of *in situ* reduced 4nmCeO<sub>2</sub>-SiO<sub>2</sub>, (Pt/4nmCeO<sub>2</sub>)/SiO<sub>2</sub> and Pt/(4nmCeO<sub>2</sub>-SiO<sub>2</sub>).<sup>1</sup>

| Sample                                      | Ce <sup>3+</sup> /wt% | Ce <sup>4+</sup> /wt% | R-factor |
|---------------------------------------------|-----------------------|-----------------------|----------|
| 4nmCeO <sub>2</sub> -SiO <sub>2</sub>       | 49.9                  | 50.1                  | 0.016    |
| (Pt/4nmCeO <sub>2</sub> )/SiO <sub>2</sub>  | 49.4                  | 50.6                  | 0.019    |
| Pt/(4nmCeO <sub>2</sub> -SiO <sub>2</sub> ) | 51.8                  | 48.2                  | 0.027    |

<sup>1</sup>For the LCF, CeO<sub>2</sub> was used as a reference standard for Ce<sup>4+</sup>; Ce(NO<sub>3</sub>)<sub>3</sub>·6H<sub>2</sub>O was used as a reference standard for Ce<sup>3+</sup>. CeO<sub>2</sub>:SiO<sub>2</sub>=1:10 (w/w) in all samples. (Pt/CeO<sub>2</sub>)/SiO<sub>2</sub> and Pt/(CeO<sub>2</sub>-SiO<sub>2</sub>) are *in situ* reduced.

**Table S4.** XANES spectra of Pt L<sub>3</sub> edge of *in situ* reduced Pt/SiO<sub>2</sub>, Pt/CeO<sub>2</sub>, (Pt/4nmCeO<sub>2</sub>)/SiO<sub>2</sub> and Pt/(4nmCeO<sub>2</sub>-SiO<sub>2</sub>) samples.<sup>1</sup>

| Sample                                      | Pt <sup>0</sup> /wt% | Pt <sup>2+</sup> /wt% | Pt <sup>4+</sup> /wt% | R-factor |
|---------------------------------------------|----------------------|-----------------------|-----------------------|----------|
| Pt/SiO <sub>2</sub>                         | 100                  | 0                     | 0                     | 0.038    |
| Pt/CeO <sub>2</sub>                         | 81.0                 | 0                     | 19.0                  | 0.006    |
| (Pt/4nmCeO <sub>2</sub> )/SiO <sub>2</sub>  | 47.4                 | 0                     | 52.6                  | 0.037    |
| Pt/(4nmCeO <sub>2</sub> -SiO <sub>2</sub> ) | 100                  | 0                     | 0                     | 0.011    |

<sup>1</sup>For the LCF, PtO<sub>2</sub> was used as a reference standard for Pt<sup>4+</sup>. Pt(NH<sub>3</sub>)<sub>4</sub>(NO<sub>3</sub>)<sub>2</sub> was used as a reference standard for Pt<sup>2+</sup>. Pt foil was used as a reference standard for Pt<sup>0</sup>.

**Table S5.** Pt loading amount during catalyst stability test characterized by ICP-OES.

| Pt loading amount/wt%             | (Pt/4nmCeO <sub>2</sub> )/SiO <sub>2</sub> | Pt/(4nmCeO <sub>2</sub> -SiO <sub>2</sub> ) |
|-----------------------------------|--------------------------------------------|---------------------------------------------|
| Fresh catalyst                    | 0.2376                                     | 0.1977                                      |
| 1 <sup>st</sup> recycled catalyst | 0.1843                                     | 0.1277                                      |
| 2 <sup>nd</sup> recycled catalyst | 0.1677                                     | 0.1059                                      |
| 3 <sup>rd</sup> recycled catalyst | 0.1544                                     | 0.1094                                      |
| 4 <sup>th</sup> recycled catalyst | 0.1335                                     | 0.1063                                      |

**Table S6.** CeO<sub>2</sub> loading amount during catalyst stability test characterized by ICP-OES.

| CeO <sub>2</sub> loading amount/wt% | (Pt/4nmCeO <sub>2</sub> )/SiO <sub>2</sub> | Pt/(4nmCeO <sub>2</sub> -SiO <sub>2</sub> ) |
|-------------------------------------|--------------------------------------------|---------------------------------------------|
| Fresh catalyst                      | 6.5790                                     | 7.8509                                      |
| 1 <sup>st</sup> recycled catalyst   | 6.7438                                     | 5.0041                                      |
| 2 <sup>nd</sup> recycled catalyst   | 6.8105                                     | 4.3174                                      |
| 3 <sup>rd</sup> recycled catalyst   | 7.1054                                     | 5.8882                                      |
| 4 <sup>th</sup> recycled catalyst   | 6.1070                                     | 4.7866                                      |

**Table S7.** Phenylacetylene hydrogenation reported in other references.

| Catalyst          | Temperature/°C | Conversion/% | Selectivity/% | Reference |
|-------------------|----------------|--------------|---------------|-----------|
| Au/graphene oxide | 60             | 99           | 99            | 5         |
| PdZn@ZIF-8        | 100            | 95           | 92            | 6         |

|                                   |    |    |      |   |
|-----------------------------------|----|----|------|---|
| Pt colloid                        | 50 | 99 | 90.2 | 7 |
| Pd/Al <sub>2</sub> O <sub>3</sub> | 50 | 99 | 96   | 8 |

---

## References

1. Z. Zhang; Y. Wang; J. Lu; J. Zhang; M. Li; X. Liu; F. Wang, *ACS Catalysis* **2018**, *8*, 2635.
2. Z. Zhang; Y. Wang; J. Lu; C. Zhang; M. Wang; M. Li; X. Liu; F. Wang, *ACS Catalysis* **2016**, *6*, 8248.
3. M. Guo; J. Lu; Y. Wu; Y. Wang; M. Luo, *Langmuir* **2011**, *27*, 3872.
4. Z. Wu; M. Li; J. Howe; H. M. Meyer, III; S. H. Overbury, *Langmuir* **2010**, *26*, 16595.
5. L. Shao; X. Huang; D. Teschner; W. Zhang, *ACS Catalysis* **2014**, *4*, 2369.
6. P. Weerachawanasak; O. Mekasuwandumrong; M. Arai; S.-I. Fujita; P. Praserthdam; J. Panpranot, *Journal of Catalysis* **2009**, *262*, 199.
7. S. Domínguez-Domínguez; Á. Berenguer-Murcia; D. Cazorla-Amorós; Á. Linares-Solano, *Journal of Catalysis* **2006**, *243*, 74.
8. S. Domínguez-Domínguez; Á. Berenguer-Murcia; Á. Linares-Solano; D. Cazorla-Amorós, *Journal of Catalysis* **2008**, *257*, 87.
